# 1 **Translational efficiency across healthy and tumor tissues is** 2 **proliferation-related**

3 **Xavier Hernandez-Alias<sup>1</sup>, Hannah Benisty<sup>1</sup>, Martin H. Schaefer<sup>1,2,\*</sup>, Luis Serrano<sup>1,3,4,\*</sup>**

4 <sup>1</sup>Centre for Genomic Regulation (CRG), The Barcelona Institute of Science and Technology,  
5 Dr. Aiguader 88, Barcelona 08003, Spain

6 <sup>2</sup>IEO European Institute of Oncology IRCCS, Department of Experimental Oncology, Via  
7 Adamello 16, Milan 20139, Italy

8 <sup>3</sup>Universitat Pompeu Fabra (UPF), Barcelona 08002, Spain

9 <sup>4</sup>ICREA, Pg. Lluís Companys 23, Barcelona 08010, Spain

10 \*Corresponding authors: martin.schaefer@ieo.it (M.H.S.), luis.serrano@crgeu (L.S.)

## 11 **ABSTRACT**

12 **Background:** Different tissues express genes with particular codon usage and anticodon  
13 tRNA repertoires. However, the codon-anticodon co-adaptation in humans is not completely  
14 understood, as well as its effect on tissue-specific protein levels.

15 **Results:** We first validated the accuracy of small RNA-seq for tRNA quantification across  
16 five human cell lines. We then analyzed tRNA expression in more than 8000 tumor samples  
17 from TCGA, together with their paired mRNA-seq and proteomics data, to determine the  
18 Relative Translation Efficiency. We thereby elucidate that the dynamic adaptation of the  
19 tRNA pool is largely related to the proliferative state across tissues, which determines tissue-  
20 specific translation efficiency. Furthermore, the aberrant translational efficiency of ProCCA  
21 and GlyGGT in cancer, among other codons, which is partly regulated by the tRNA gene  
22 copy numbers and their promoter DNA methylation, is associated with poor patient survival.

23 **Conclusions:** The distribution of tissue-specific tRNA pools over the whole cellular  
24 translome affects the subsequent translational efficiency, which functionally determines a  
25 condition-specific expression program in tissues both in healthy and tumor states.

26 **KEYWORDS**

27 tRNA, translation, The Cancer Genome Atlas, tissue, regulation, miRNA, codon usage

28 **BACKGROUND**

29 In the light of the genetic code, multiple 3-letter combinations of nucleotides in the mRNA  
30 can give rise to the same amino acid, which are known as synonymous codons. However,  
31 despite the homology at the protein level, these different codons are recognized distinctly by  
32 the transcriptional and translational machineries (1,2), and ultimately cause changes at  
33 multiple levels of gene expression. Therefore, the non-uniform abundance of synonymous  
34 codons across different tissues and among distinct functional gene sets has been proposed  
35 as an adaptive mechanism of gene expression regulation (3), particularly linked to the  
36 proliferative state (4). Nevertheless, in human, it is still under debate whether the efficiency  
37 of gene expression is the main selective pressure driving the evolution of genomic codon  
38 usage (5).

39 The 61 amino-acid-coding codons need to be recognized by 46 different tRNA isoacceptors  
40 distributed across 428 Pol-III-transcribed tRNA genes (6), thus requiring wobble interactions  
41 (non-Watson-Crick base pairing). This complexity of the tRNA repertoire is further enhanced  
42 by an average of 11-13 base modifications per tRNA and all possible combinations thereof  
43 (7). The underlying mechanisms regulating tRNA gene expression and modification are far  
44 from resolved (8,9). However, it has been established that different conditions and tissues  
45 showcase distinct tRNA abundances (4,10) and codon usages (3,11).

46 In order to understand such changes in codon-anticodon co-adaptation, orthogonal datasets  
47 of gene expression including tRNA quantification are required, which needs to overcome the  
48 challenges of strong secondary structures and abundant chemical modifications. Recent  
49 technological developments have paved the way for sensitive high-throughput tRNA  
50 sequencing across tissues and conditions (12,13). Aside from these methods and despite  
51 the lower coverage, tRNA reads can also be detected from generic small RNA-seq datasets

52 (14–18). In this context, The Cancer Genome Atlas (TCGA) has been recently used to  
53 investigate the alteration of tRNA gene expression and translational machinery in cancer,  
54 which may play a role in driving aberrant translation (19,20).

55 To validate the use of small RNA-seq for tRNA quantification, we first compare tRNA levels  
56 determined in HEK293 by well-established tRNA sequencing methods (Hydro-tRNAseq and  
57 demethylase-tRNA-seq) (12,13,21), with those obtained by small RNA-seq. Then we  
58 quantify the tRNA repertoire of five cell lines using Hydro-tRNAseq and perform small RNA-  
59 seq in parallel. Comparison of the tRNA abundance obtained by both approaches shows that  
60 it is possible to accurately estimate relative tRNA abundance of cells and tissues using small  
61 RNA-seq. Furthermore, we show that both types of quantification are informative enough to  
62 distinguish between the five analyzed human cell lines covering multiple tissue types. In  
63 consequence, we apply a tRNA-specific computational pipeline to re-analyze 8,534 small  
64 RNA-seq datasets from TCGA (22). We find that the tissue-specificity of tRNA expression is  
65 largely proliferation-related, even within healthy tissues. The tRNA quantification of TCGA  
66 samples enables their comparison with paired and publicly available mRNA-seq, proteomic,  
67 DNA methylation and copy number data, which underscores the role of tRNAs in globally  
68 controlling a condition-specific translational program. We discover multiple codons, including  
69 ProCCA and GlyGGT, whose translational efficiency is compromised and leads to poor  
70 prognosis in cancer. Finally, promoter DNA methylation and tRNA gene copy number arise  
71 as two regulatory mechanisms controlling tRNA gene expression in cancer.

## 72 **RESULTS**

### 73 **tRNA quantification and modifications from small RNA-seq data**

74 In order to test how accurately we can extract tRNA abundance information contained in  
75 small RNA sequencing data, we re-analyze four publicly-available datasets of the cell line  
76 HEK293 (18,23,24). In contrast to previous studies analyzing tRNA expression from small  
77 RNA-seq data (19,20), we use a computational pipeline specifically developed for the

78 accurate mapping of tRNA reads (16) in order to quantify all different isoacceptor species  
79 (Figure 1A, see Methods). To validate the accuracy of these small RNA-seq quantifications,  
80 we retrieve three datasets of well-established tRNA sequencing methods (Hydro-tRNAseq  
81 and demethylase-tRNA-seq) applied to the same cell type (12,13,21), which autocorrelate in  
82 the range of 0.72-0.79 among themselves (Table S1). In comparison, our four HEK293 small  
83 RNA-seq quantifications show an average Spearman correlation against these three  
84 conventional datasets of 0.68. Compared to the anticodon Spearman correlation of 0.61 as  
85 published by Zhang et al. (19), our tRNA-specific mapping pipeline performs better than the  
86 previously published protocol, since all our correlations lie over that value.

87 Further than correlating small RNA-seq data with conventional tRNA-seq datasets, we  
88 analyze whether small RNA-seq quantifications are informative enough to distinguish  
89 between different human cell lines covering multiple tissue types. We therefore apply both  
90 small RNA-seq and Hydro-tRNAseq to HEK293 (kidney), HCT116 (colon), HeLa (cervix),  
91 MDA-MB-231 (breast), and BJ fibroblasts. However, given the high variability between  
92 replicates of MDA-MB-231 Hydro-tRNAseq quantifications, this cell line was excluded from  
93 further analyses (Table S2). First, the correlations between the two methods of identical  
94 samples and computational mapping pipeline range between 0.93 and 0.96 for all cell lines.  
95 tRNA quantifications from both protocols are compared and significantly higher Spearman  
96 correlations are obtained within matching samples versus mismatching cell lines (Figure 1B).  
97 In consequence, we demonstrate that small RNA-seq quantifications of sample-specific  
98 tRNA profiles show a good agreement with Hydro-tRNAseq.

99 We also detect tRNA base modifications in both protocols by nucleotide variant calling, as  
100 described in Hoffmann et al. (16). In all cases, considering the modifications that are  
101 detected in all three replicates, Hydro-tRNAseq datasets identify a larger number of  
102 modifications than small RNA-seq, as expected by the more uniform and deeper coverage of  
103 this method (Table S2). Furthermore, we detect a significant enrichment of the Hydro-

104 tRNAseq modifications in the small RNA-seq data ( $p < 1e-16$ , Fisher test), indicating that the  
105 latter contains also information on tRNA modifications (Figure 1C).

106 Taken together, these observations demonstrate the applicability of small RNA-seq data for  
107 the quantification tRNAs and their modifications. We therefore apply the same computational  
108 pipeline to all healthy and primary tumor small RNA-seq samples from 23 cancer types of  
109 The Cancer Genome Atlas (TCGA), which consists of 8,605 samples distributed among 17  
110 different human tissues (Figure 1D, number of samples and their abbreviations in Table S3).

111 **Figure 1. tRNA quantification and modifications from small RNA-seq data.** (A)  
112 Schematic pipeline for accurate mapping of tRNA reads. (B) Correlations between tRNA  
113 quantifications by small RNA-seq and Hydro-tRNAseq of matching (correlations within the  
114 same cell line) versus non-matching (different cell lines) samples. The p-value corresponds  
115 to a one-tailed Wilcoxon rank-sum test, with  $n_{\text{matching}}=9$  and  $n_{\text{non-matching}}=72$ . (C) Overlap of  
116 the detected tRNA modifications upon variant calling by both methods. (D) The TCGA  
117 network contains small RNA-seq data alongside mRNA-seq, DNA methylation arrays, non-  
118 targeted proteomics, and copy number alteration quantification comprising 17 tissues.

### 119 **Proliferation is the major driver of tissue-specificity in tRNAs**

120 To determine the tissue-specificity of tRNAs in physiological conditions, the tRNA levels of  
121 all 675 healthy samples in TCGA tissues are analyzed. The isoacceptor abundances show  
122 a significant tissue-specificity for all 46 annotated anticodons ( $q < 0.05$ , FDR-corrected  
123 Kruskal-Wallis test grouped by cancer types). Such differences between tissues are also  
124 observed by hierarchical clustering of the median expression between all groups (Figure  
125 2A). Furthermore, healthy samples from cancer types originating from the same tissue tend  
126 to cluster together: READ and COAD from the gut; KIRC, KIRP and KICH from the kidney;  
127 LUAD and LUSC from the lung; UCEC and CESC from the uterus; LIHC and CHOL from the  
128 liver (refer to Table S3 for full cancer names). On the other hand, in terms of anticodon

129 abundances, three main subgroups of tRNAs with low, medium and high expression can be  
130 distinguished across all cancer types (Figure 2A).

131 Regarding codon usage, a measure of tRNA abundance taking into account the relative  
132 contribution of each tRNA anticodon among the set of codons of a certain amino acid is the  
133 Relative Anticodon Abundance. From this perspective, a principal component analysis (PCA)  
134 of the healthy control samples in TCGA also shows clear differences between tissues  
135 (Figure 2B). Moreover, our first component, which explains 18.5% of the variance, correlates  
136 positively with the proliferation marker Ki67 ( $R_{\text{spearman}} = 0.45$ ) (25). To further interrogate the  
137 biological functions related to the variability of anticodon abundances between samples, we  
138 compute the correlation of the whole mRNA-seq transcriptome against the first PCA  
139 component, and analyze it by Gene Set Enrichment Analysis (GSEA). As a result, the top  
140 correlating genes are enriched in proliferation and immune cell activation, while the lowest  
141 correlations belong to genes related with oxidative metabolism and respiration (Figure 2C,  
142 Table S4). This confirms, as has been previously suggested (4), that there is a proliferative  
143 tRNA expression program.

144 Overall, we observe patterns of tissue-specific tRNA expression in TCGA healthy samples.  
145 Furthermore, our analysis identifies the proliferative state of tissues as the major biological  
146 function driving the variability on tRNA abundances.

147 **Figure 2. Proliferation is the major driver of tissue-specificity in tRNAs.** (A) Medians of  
148 square-root-normalized tRNA abundances across all TCGA tissues. The color of the tissue  
149 labels correspond to the average Ki67 expression. (B) Principal Component Analysis (PCA)  
150 of the Relative Anticodon Abundances (RAA) of TCGA, where the color scale corresponds to  
151 the mean tissue expression of Ki67. The Spearman correlations of Ki67 with the components  
152 are shown, as well as the samples of most extreme tissues. (C) Top positive and negative  
153 GO terms upon Gene Set Enrichment Analysis (GSEA) of the correlations of the first PCA  
154 component against all genes. Refer to Supplementary Table 3 for full cancer type names.

## 155 **tRNA repertoires determine tissue-specific translational efficiency**

156 Given that different tissues express distinct tRNA repertoires, we wondered whether they  
157 could have an effect in protein translation. In this context, and based on previous studies  
158 underscoring the global control role of codon usage as a competition for a limited tRNA pool  
159 (26–28), we define the Relative Translation Efficiency (RTE) as the balance between the  
160 supply (i.e. the anticodon tRNA abundances) and demand (i.e. the weighted codon usage  
161 based on the mRNA levels) for each of the 60 codons (excluding methionine and Stop  
162 codons). Furthermore, we normalize both the codon and anticodon abundances within each  
163 amino acid family (i.e. relative to the most abundant synonymous codon/anticodon), in order  
164 to remove the effect of amino acid biases and get a cleaner measure of codon optimality  
165 (29).

166 To validate the suitability of RTE in determining the translational efficiency, we correlate the  
167 RTE value of all proteins against the available proteomics data of paired TCGA samples  
168 (30,31), which includes breast and colorectal tissues (tumor only, as no healthy samples are  
169 available). Although the correlation is poor (but significant), both the protein abundances and  
170 the protein-to-mRNA ratios correlate significantly better with RTE than with the classical  
171 tRNA Adaptation Index [tAI] (32,33) or with a relative tAI with normalized weights within each  
172 amino acid family, which do not consider the mRNA codon demand (Figure 3A).  
173 Furthermore, the correlation of RTE with protein-to-mRNA ratio is slightly but significantly  
174 higher than with protein levels alone, which indicates that the first is a better proxy for the  
175 process of translation.

176 Next, we calculate the RTE for the 620 healthy samples for which both tRNA abundances  
177 and mRNA levels are available. When analyzing the tissue medians of RTE weights per  
178 each codon (RTE<sub>w</sub>), we observe that most codons are optimally balanced (RTE<sub>w</sub> =1), while  
179 12.4% and 23.6% of codons are favored (RTE<sub>w</sub> >2) and disfavored (RTE<sub>w</sub> <0.5)  
180 respectively. The tissue clustering again shows that healthy samples of cancer types from

181 the same tissue have similar RTEw profiles, which separates two major clusters of mostly  
182 high-Ki67 and low-Ki67 tissues (Figure S1).

183 In order to identify the codons contributing most to the differences between tissues, we  
184 compute a bidimensional PCA across all samples and RTEw (Figure 3B). Both the first and  
185 second components significantly correlate with the proliferation marker Ki67 (0.4 and 0.35;  
186 see Figure 2B). In agreement with the proliferation- and differentiation-related codons of  
187 Gingold et al. (4), such proliferative pattern is similarly reproduced by the codons  
188 contributing to the first PCA component, which has the strongest association to proliferation  
189 (Figure 3B). Further, similarly to the tRNA abundances (Figure 2B), a GSEA of correlating  
190 genes with the first component highlights the link with proliferation-related terms (Table S5).  
191 On the other hand, the first component also clearly separates codons based on the GC  
192 content of the third codon base, which has recently been associated with differentiation (high  
193 in nnC/G codons) versus self-renewal functions (high in nnA/T) (34), as well as with  
194 proliferative transcriptomes (35).

195 The previous analyses support the idea of proliferation-related tRNAs driving changes in  
196 translational efficiencies. In that case, we expect that the two most extreme tissues in terms  
197 of proliferation (brain and gut, excluding thymus for its low number of samples) differ in the  
198 optimization of proliferation-related proteins. As such, we compute the average RTEw for  
199 these two tissues, analyze the subsequent RTE score for each protein, and perform a GSEA  
200 of the differential RTE per protein. Consistent with our hypothesis, the results indicate that  
201 gut-optimized proteins are enriched in translation, DNA replication and protein localization,  
202 whereas brain-optimized proteins are related to phospholipid production and neural function  
203 (Figure 3C, Table S6). Taken together, this result confirms that the tRNA-dependent  
204 translational efficiency is optimized for the translation of tissue-specific genes, particularly in  
205 function of the proliferation state.



206 **Figure 3. tRNA repertoires determine tissue-specific translational efficiency.** (A) Three  
207 metrics of translation efficiency (the classical tAI, a relative tAI with normalized weights  
208 within each amino acid family, and the Relative Translation Efficiency described in this  
209 article) are Spearman correlated against two proxies of translation (protein abundance and  
210 protein-to-mRNA ratio) for all samples for which proteomics data is available (BRCA, COAD  
211 and READ). Statistical differences are determined by sample-paired two-tailed Wilcoxon  
212 rank-sum test. (B) Principal Component Analysis (PCA) of the RTEw of TCGA, where the  
213 color scale corresponds to the mean tissue expression of Ki67. The Spearman correlations  
214 of Ki67 with the components are shown, as well as the samples of most extreme tissues. On  
215 the right, the top and bottom proliferation- and differentiation-related codons, as defined by  
216 Gingold et al. (2014), ordered by their contribution to the first PCA component. (C) GSEA of  
217 the differential RTE between extreme tissues ( $\Delta RTE = RTE_{\text{Colorectal}} - RTE_{\text{Brain}}$ ), showing the  
218 top five GO terms with high (left) and low (right) RTE in colorectal versus glial tissues. Refer  
219 to Supplementary Table 3 for full cancer type names.

## 220 **Aberrant translational efficiencies drive tumor progression**

221 Given that proliferation is a major determinant of translational efficiency in healthy tissues, its  
222 importance could be extrapolated to pathological conditions such as cancer. In fact, aberrant  
223 expression of tRNAs and codon usage have been broadly related with tumorigenesis and  
224 cancer progression (19,20,36,37). We therefore investigate 22 cancer types from TCGA in  
225 order to determine which codons are translationally compromised in disease.

226 Similar to the analysis performed on the healthy tissues, we quantify all tRNA abundances of  
227 TCGA primary tumor samples (Figure S2) and determine their corresponding translational  
228 efficiencies using the RTE metric. By analyzing the differential RTEw between normal and  
229 tumor samples, we observe many significant differences in all 60 codons across the 22  
230 cancer types (Figure 4A). Among the most consistent changes, the ProCCA codon is  
231 significantly more favored in tumors for 8 out of 10 cancer types, while the ProCCG is

232 disfavored in 14 out of 16 cancers (Figure 4B). In the case of glycine, translation appears  
233 more efficient for GlyGGT in healthy samples (13/13), whereas tumor mostly favors GlyGGC  
234 (9/12) and GlyGGG (7/9).

235 In terms of patient survival, we divide the TCGA patients in two groups based on their low or  
236 high tumor RTEw and analyze their survival probability (Figure 4C, Table S7). Among  
237 others, and consistent with the previous analysis, high translational efficiency weights of  
238 ProCCA are associated with poor prognosis in kidney renal clear cell carcinoma and kidney  
239 renal papillary cell carcinoma. Proline limitation in clear cell renal cell carcinoma has been  
240 shown to compromise CCA-decoding tRNA<sup>Pro</sup> aminoacylation, leading to reduced tumor  
241 growth (38). In contrast, high RTEw of GlyGGT and ValGTC lead to longer survival in kidney  
242 chromophobe and head and neck squamous cell carcinoma, respectively.

243 To determine the impact of aberrant translational efficiencies in regulating an oncogenic  
244 translation program, we calculate the differential RTE for the whole genome based on the  
245 average RTEw of healthy and tumor samples in kidney renal clear cell carcinoma, since it is  
246 the cancer type with the most RTEw differences. The GSEA of the resulting  $\Delta$ RTE score  
247 indicates that cancer RTEw enhance the translation of proteins related to DNA replication  
248 and gene expression, whereas the healthy kidney samples favor development and  
249 differentiation processes (Table S8). As the RTEw of the ProCCA is specifically disturbed in  
250 cancer, we also interrogate how this codon is distributed along the genome. We therefore  
251 perform a GSEA on the relative codon usage of ProCCA, which shows that DNA replication  
252 and cell cycle functions lie among the most CCA-enriched genes, while morphogenesis and  
253 differentiation terms are CCA-depleted (Table S9). Together with the low-proliferative state  
254 of kidney (Figure 2B), the over-efficiency of a proliferation-related codon in this tissue can  
255 thus perturb its cellular RTE.

256 Overall, we detect differences at the level of RTEw between tumor and healthy tissues,  
257 which show a functional relevance to the disease state. Therefore, while the differential

258 expression of tRNAs in TCGA had been already discussed elsewhere (19,20), we could here  
259 elucidate their oncogenic effect in translational efficiency. In particular, ProCCA appears as  
260 an interesting codon candidate in favoring tumor progression, which we had also detected in  
261 healthy tissues to be associated with proliferation (Figure 3B, Table S5).

262 **Figure 4. Aberrant translational efficiencies drive tumor progression.** (A) Differential  
263 RTEw between healthy and tumor samples across 22 cancer types, as measured by  
264  $\log_2(\text{RTEw}_{\text{Tumor}}/\text{RTEw}_{\text{Healthy}})$ . Only significant differences are colored, which are determined  
265 using a two-tailed Wilcoxon rank-sum test and corrected for multiple testing by FDR. (B)  
266 Boxplot of the RTEw of ProCCA and AlaGCG codons across TCGA cancer types. (C)  
267 Survival curves for the previous codons in KIRC, KIRP and BLCA patients. The survival  
268 analysis was performed for all codons whose translational efficiency was significantly  
269 different in more than 5 cancer types in the one direction with respect to the other [Abs(UP-  
270 DOWN)>5], and correspondingly corrected for multiple comparisons using FDR. Refer to  
271 Supplementary Table 3 for full cancer type names.

#### 272 **Promoter methylation and gene copy number regulate tRNA expression**

273 Aberrant translational efficiencies in cancer are partially caused by the differential expression  
274 of tRNA genes (Figure S2). To determine the underlying mechanisms driving changes in  
275 expression, we retrieve the methylation and copy number alteration (CNA) data from TCGA  
276 samples, as a possible means for tRNA gene regulation. While CNA information cover 84%  
277 of tRNA genes, the 450K-BeadChip methylation arrays used in TCGA are mostly centered  
278 on the coding genome (Bibikova et al., 2011) and yield a coverage of only 37%.

279 In order to make the gene-based data comparable with the measured isoacceptor-based  
280 tRNA expression, we average methylation and CNA levels over all genes within the same  
281 isoacceptor family, at the cost of losing resolution. For each isoacceptor and each cancer  
282 type, we finally fit a Multiple Linear Regression to determine how are promoter methylation  
283 and CNA affecting tRNA expression (Figure 5A, Table S10). Among all models, the

284 significant coefficients for methylation and CNA are significantly negative and positive,  
285 respectively. Despite the limited explained variance of the models (average  $R^2=0.023$ ), such  
286 results indicate that promoter methylation contributes to inhibition of tRNA gene expression,  
287 while an increase in the gene copy number enhances tRNA expression.

288 Given the association of the codon ProCCA with cancer prognosis (Figure 4C), we explore  
289 the expression pattern of tRNAPro in TCGA. In particular, tRNAPro<sup>AGG</sup>, which recognizes the  
290 codon ProCCA, is overexpressed in 8 out of 9 cancer types (Figure S2A). To get a more  
291 accurate picture of the tRNA gene methylation levels, we also analyze recently published  
292 bisulfite sequencing data (39), which, for 47 samples among nine cancer types, improved  
293 the coverage of tRNA genes up to an average of 81%. In total, tRNAPro<sup>AGG</sup> genes stand  
294 among the most duplicated and least methylated proline isoacceptors in cancer (Figure S3A-  
295 B), in particular at the chr6.tRNA12 and chr16.tRNA12 genes (Figure 5B). Furthermore,  
296 tRNAPro<sup>AGG</sup> gene duplications occur most frequently in kidney cancers (Figure S3C). On the  
297 other hand, although the other CCA-decoding tRNAPro<sup>TGG</sup> is not differentially expressed in  
298 cancer (Figure S2), its genes are as similarly methylated and duplicated as tRNAPro<sup>AGG</sup>  
299 (Figure 5B, Figure S3).

300 In short, promoter methylation and CNA appear as two possible regulatory mechanisms of  
301 tRNA expression in cancer, which suggests that similar mechanisms that control the Pol-II-  
302 mediated RNAs might also regulate the expression of Pol-III non-coding transcriptome, such  
303 as tRNA genes. However, more accurate and high-throughput data on the methylation and  
304 CNA of the non-coding genome together with gene-based tRNA quantifications are needed  
305 to make stronger associations.

306 **Figure 5. Promoter methylation and gene copy number regulate tRNA expression.** (A)  
307 A Multiple Linear Regression (MLR) between square-root-normalized tRNA expression and  
308 the average promoter methylation (450K BeadChip array) and gene copy number at the  
309 isoacceptor level. Among all MLRs for each isoacceptor and each cancer type separately,

310 the dots show the FDR-normalized significant coefficients based on their corresponding t-  
311 statistic p-value, and red/blue show whether they are negative/positive respectively. The p-  
312 value corresponds to a two-tailed binomial test between  $n_{\text{pos}}$  and  $n_{\text{neg}}$ . (B) Differential  
313 promoter methylation (bisulfite sequencing) between healthy and tumor samples of genes  
314 expressing proline tRNAs, as measured by  $\Delta\%Me=(\%Me_{\text{Tumor}}-\%Me_{\text{Healthy}})$ . Refer to  
315 Supplementary Table 3 for full cancer type names.

## 316 **DISCUSSION**

317 In this study, we use a systems biology approach to interrogate the multi-omics TCGA  
318 dataset under the perspective of translational efficiencies. We therefore first validate the  
319 suitability of small RNA-seq data in reproducing conventional tRNA-seq quantifications  
320 based on a gold standard set of five tissue-wide human cell lines. In fact, knowing that small  
321 RNA-seq datasets have a limited tRNA coverage and tend to be biased towards tRNA  
322 fragments and unmodified tRNAs (18,40), we extend and apply a computational pipeline for  
323 accurate mapping of tRNA reads (16). As a result, we obtain reproducible and informative  
324 quantifications of all isoacceptors in our gold standard cell lines as well as in thousands of  
325 samples across 23 cancer types of TCGA, exceeding the quality of similarly published data  
326 (19,20).

327 From these quantifications, we then elucidate their effect on the translational efficiency by  
328 defining the RTE, for Relative Translation Efficiency, which is a balance between the tRNA  
329 supply and the codon demand. Although a more accurate RTE would have determined the  
330 supply and demand based on the aminoacylated portion of tRNAs (41) and the ribosome-  
331 bound mRNAs (42) respectively, we approximate such measures by our tRNA  
332 quantifications and the publicly-available mRNA-seq data of TCGA. In agreement with  
333 current studies showing that a dynamic codon usage need to compete for a limited tRNA  
334 pool (28,29), we demonstrate that RTE is better measure of codon optimality than previously  
335 published metrics such as the tAI (32,33). However, far from explaining the translation

336 process, the still low but significant correlations of protein-RTE in human, in contrast to  
337 unicellular organisms, suggest that protein expression is also dependent on other layers of  
338 regulation, such as transcriptional and post-transcriptional machineries, translation initiation,  
339 epigenetic modifications of DNA and RNAs, or protein degradation mechanisms (43).

340 On the level of translational efficiency, in agreement with previous studies (4,36), we detect  
341 that the proliferative state is the major determinant of RTE differences both across healthy  
342 tissues and in cancer. Moreover, in contrast to recent work challenging the tissue-specificity  
343 of codon-anticodon co-adaptation in human (29,43), our data here support the idea that  
344 tissue-specific RTEw have functional implications on the tissue phenotype (e.g. in  
345 determining neural differentiation in brain, or inducing abnormal proliferation in cancer).  
346 Furthermore, we observe a pattern of proliferative nnA/T versus differentiative nnC/G  
347 codons. Based on ribosome profiling experiments of pluripotency changes in embryonic  
348 stem cells (34), this could be attributed to the slower translation in differentiated cells of  
349 codons decoded by tRNAs that require adenosine-to-inosine modification at the wobble-  
350 base pairing position. In particular, we detect the ProCCA codon to be significantly more  
351 favored in proliferative cells and leading to poor cancer prognosis in kidney carcinomas,  
352 specifically driven by an overexpression of tRNA<sup>Pro</sup><sup>AGG</sup> in cancer. Proline limitation in clear  
353 renal cell carcinoma has indeed been shown to mostly compromise tRNA<sup>Pro</sup><sup>AGG</sup>  
354 aminoacylation, leading to slower proline translation and reduced tumor growth (38).  
355 Furthermore, in support of our approach for isoacceptor quantification and translational  
356 efficiency, similar studies of tRNA levels in TCGA have controversially claimed an opposite  
357 prognostic value for the ProCCA codon in clear renal cell carcinoma (19,20).

358 In an effort to elucidate the mechanisms regulating the expression of tRNAs, we observe  
359 that the tRNA gene copy number and their DNA methylation state have a positive and  
360 inhibitory effect on tRNA expression, respectively. In this context, DNA methylation has  
361 previously been linked to the silencing of type II genes (such as tRNAs) of the Pol-III  
362 transcriptome (44). Here we specifically propose a role for DNA methylation in regulating the

363 overexpression of tRNA<sup>Pro</sup><sup>AGG</sup> in cancer. In terms of the copy number alterations, it is not  
364 surprising to detect tRNA gene duplications in tumors, but the functional role in disease of  
365 different isodecoder genes that share the same anticodon is still a matter of debate (45).  
366 With the advent of more accurate and high-throughput multi-omics datasets, our knowledge  
367 on the underlying mechanisms controlling tRNA expression, degradation, and the effect of  
368 their modifications will be further expanded (8,9). Recent studies in TCGA have actually  
369 observed an upregulation of tRNA-modifying enzymes, as well as proposed a link of tRNA-  
370 derived fragments (tRF) to proliferation (19,46).

## 371 **CONCLUSIONS**

372 This is the first high-throughput study of codon-anticodon translational efficiency over  
373 thousands of samples comprising multiple tissues and disease. We therefore demonstrate a  
374 functional role for the proliferation-driven tRNA expression differences in determining a  
375 tissue-specific phenotype, both in physiological and pathological conditions. In the future, we  
376 expect to validate the effect of such differential translational efficiency by integrating  
377 perturbation-based data and including additional gene expression regulatory layers such as  
378 tRNA modifications.

## 379 **METHODS**

### 380 **Cell lines**

381 The cell lines included in this study are HeLa, HEK293, HCT116, MDA-MB-231 and  
382 fibroblast BJ/hTERT. Cells were maintained at 37 °C in a humidified atmosphere at 5% CO<sub>2</sub>  
383 in DMEM 4.5g/L Glucose with UltraGlutamine media supplemented with 10% of FBS and 1%  
384 penicillin/streptomycin.

### 385 **RNA extraction**

386 Cells were grown in 60mm dishes for 48h. Total RNA from HeLa, HEK293, HCT116, MDA-  
387 MB-231 and fibroblast BJ/hTERT was extracted using the miRNeasy Mini kit. Independent

388 replicates where grown and RNA was extracted on different days. 20 µg of total RNA was  
389 treated following either the protocol of Hydro-tRNAseq (12) or generic small RNA-seq.

### 390 **Hydro-tRNA sequencing**

391 Total RNA was resolved on 15% Novex TBE urea gels and size-selected for 60-100 nt  
392 fragments. The recovered material was then alkaline hydrolyzed (10mM sodium carbonate  
393 and 10mM sodium bicarbonate) for 10 minutes at 60°C. The resulting RNA was de-  
394 phosphorylated with Antarctic Phosphatase (New England Biolabs) at 37°C for 1 hour. De-  
395 phosphorylated RNA was purified with an RNeasy MinElute spin column and re-  
396 phosphorylated with Polynucleotide Kinase (NEB). PNK-treated tRNAs were purified with an  
397 RNeasy MinElute spin column and, similar to small RNA-seq library preparation, adaptor-  
398 ligated, reverse-transcribed and PCR-amplified for 14 cycles. The resulting cDNA was  
399 purified using a QIAQuick PCR Purification Kit and sequenced on Illumina HiSeq 2500  
400 platform in 50bp paired-end format.

401 From all five cell lines, the isoacceptor abundances of MDA-MB-231 yielded a median of 3-5  
402 times higher standard deviation than the other Hydro-tRNAseq quantifications (Table S2),  
403 thus suggesting some technical problem with this cell line. In consequence, this cell line was  
404 excluded from any further analysis.

### 405 **Small RNA sequencing**

406 Total RNA was directly adaptor-ligated, reverse-transcribed and PCR-amplified for 12  
407 cycles. The resulting cDNA was purified using a QIAQuick PCR Purification Kit and  
408 sequenced on Illumina HiSeq 2500 platform in 50bp single-end format.



## 409 **Computational Analysis**

### 410 tRNA quantification and modification calling

411 In both Hydro-tRNAseq and small RNA-seq FASTQ files, sequencing adapters were  
412 trimmed using BBDuk from the BBDuk toolkit [v38.22]  
413 (<https://sourceforge.net/projects/bbmap>): k-mer=10 (allowing 8 at the end of the read),  
414 Hamming distance=1, length=10-50bp, Phred>25. Using the human reference genome  
415 GRCh38 (Genome Reference Consortium Human Reference 38, GCA\_000001405.15), a  
416 total of 856 nuclear tRNAs and 21 mitochondrial tRNAs were annotated with tRNAscan-SE  
417 [v2.0] (47).

418 Trimmed FASTQ files were then mapped using a specific pipeline for tRNAs (Figure 1A)  
419 (16). Summarizing, an artificial genome is first generated by masking all annotated tRNA  
420 genes and adding pre-tRNAs (i.e. tRNA genes with 3' and 5' genomic flanking regions) as  
421 extra chromosomes. Upon mapping to this artificial genome with Segemehl [v0.3.1] (48),  
422 reads that map to the tRNA-masked chromosomes or to the tRNA flanking regions are  
423 filtered out in order to remove non-tRNA reads and immature-tRNA reads respectively.

424 After this first mapping step, a second library is generated by adding 3' CCA tails and  
425 removing introns from tRNA genes. All 100% identical sequences of this so-called *mature*  
426 tRNAs are clustered to avoid redundancy. Next, the subset of filtered reads from the first  
427 mapping is aligned against the clustered mature tRNAs using Segemehl [v0.3.1] (48).  
428 Mapped reads are then realigned with GATK IndelRealigner [v3.8] (49) to reduce the  
429 number of mismatching bases across all reads.

430 For quantification, isoacceptors were quantified as reads per million (RPM). In order to  
431 increase the coverage for anticodon-level quantification, we consider all reads that map  
432 unambiguously to a certain isoacceptor, even though they ambiguously map to different  
433 isodecoders (i.e. tRNA genes that differ in their sequence but share the same anticodon).  
434 Ambiguous reads mapping to genes of different isoacceptors were discarded.

435 Regarding modification site calling, we only considered gene-level uniquely mapped reads,  
436 as described to be optimal in Hoffmann et al. (16). As in their pipeline, in order to distinguish  
437 mapping or sequencing errors from true misincorporation sites, we use GATK  
438 UnifiedGenotyper [v3.8] (49).

#### 439 Relative Codon Usage (RCU) and Relative Anticodon Abundance (RAA)

440 The RCU/RAA is defined as the contribution of a certain codon/anticodon to the amino acid it  
441 belongs to. The RCU of all synonymous codons and the RAA of all anticodons recognizing  
442 synonymous codons therefore sum up to 1.

$$443 \quad RCU = \frac{x_C}{\sum_{i \in C_{aa}} x_i} \quad RAA = \frac{x_A}{\sum_{i \in A_{aa}} x_i}$$

444 where  $x_C/x_A$  refers to the abundance of the codon/anticodon  $C/A$ , and  $C_{aa}$  is the set of all  
445 synonymous codons, as well as  $A_{aa}$  is the set of all anticodons that decode synonymous  
446 codons.

#### 447 tRNA Adaptation Index (tAI)

448 As described by dos Reis et al. (2003, 2004), the tAI weights every codon based on the  
449 wobble-base codon-anticodon interaction rules. Let  $c$  be a codon, then the decoding weight  
450 is a weighted sum of the square-root-normalized tRNA abundances  $tRNA_{cj}$  for all tRNA  
451 isoacceptors  $j$  that bind with affinity  $(1 - s_{cj})$  given the wobble-base pairing rules  $n_c$ .  
452 However, while dos Reis et al. (2004) assumes that highly expressed genes are codon-  
453 optimized, here we use the non-optimized s-values to avoid a circularity in our reasoning:

$$s = [0, 0, 0, 0, 0.5, 0.5, 0.75, 0.5, 0.5]$$

$$w_c = \sum_{j=1}^{n_c} (1 - s_{cj}) tRNA_{cj}$$

454 And therefore the tAI of a certain protein is the product of weights of each codon  $i_k$  at the  
455 triplet position  $k$  throughout the full gene length  $l_g$ , and normalized by the length.

$$tAI = \left( \prod_{k=1}^{l_g} w_{i_k} \right)^{1/l_g}$$

#### 456 Relative tRNA Adaptation Index (RtAI)

457 For comparison with the RTE (Figure 3A), an amino-acid-normalized tAI measure is defined  
458 by dividing each tAI weight by the maximum weight among all codons within each amino  
459 acid family.

$$Rw_c = \frac{w_c}{\max_{i \in c_{aa}}(w_i)}$$

460 And therefore the RtAI of a certain protein is the product of weights  $Rw$  of each codon  $i_k$  at  
461 the triplet position  $k$  throughout the full gene length  $l_g$ , and normalized by the length.

$$RtAI = \left( \prod_{k=1}^{l_g} Rw_{i_k} \right)^{1/l_g}$$

#### 462 Relative Translation Efficiency (RTE)

463 The RTE aims to consider not only tRNA abundances, but also the codon usage demand. In  
464 doing so, it constitutes a global measure of translation control, since the efficiency of a  
465 certain codon depends both on its complementary anticodon abundance as well as the  
466 demand for such anticodon by other transcripts. This global control has been indeed  
467 established to play an important role in defining optimal translation programs (28).

468 The definition of the RTE is based on similar previously published metrics (26,27), which  
469 consists of a ratio between the anticodon supply and demand. On the one hand, the  
470 anticodon supply is defined as the relative tAI weights  $Rw$  (see previous section). On the  
471 other, the anticodon demand is estimated from the codon usage at the transcriptome level. It

472 is computed as the frequency of each codon in a transcript weighted by the corresponding  
473 transcript expression, and finally summing up over all transcripts. Let  $c$  be a codon, then the  
474 codon usage is a weighted sum of the counts of codon  $c_i$  in gene  $j$  weighted by the mRNA-  
475 seq abundance  $mRNA_j$  for all genes in the genome  $g$ :

$$CU_c = \sum_{j=1}^g c_{ij} mRNA_j$$

476 Similarly to the supply, the anticodon demand is then normalized within each amino acid  
477 family:

$$D_c = \frac{CU_c}{\max_{i \in c_{aa}}(CU_i)}$$

478 Finally, the RTE weights (RTEw) are defined as the ratio between the codon supply  $S_c$  and  
479 demand  $D_c$ :

$$RTEw_c = \frac{S_c}{D_c}$$

480 And therefore the RTE of a certain protein is the product of weights  $RTEw$  of each codon  $i_k$   
481 at the triplet position  $k$  throughout the full gene length  $l_g$ , and normalized by the length.

$$RTE = \left( \prod_{k=1}^{l_g} RTEw_{i_k} \right)^{1/l_g}$$

## 482 Gene Set Enrichment Analysis (GSEA)

483 We analyzed the enrichment of gene sets of the GO Biological Process Ontology using the  
484 GSEA algorithm (50). The score used to generate the ranked list input is specified in the text  
485 for each analysis.

## 486 Survival Analysis

487 To analyze how translational efficiency of a certain codon (RTEw) can affect the survival  
488 probability in cancer, patients of a certain cancer type are divided in two groups of low/high  
489 RTEw, which correspond to the patients having the top and bottom 40% RTEw. The Kaplan-  
490 Meier curves are then computed to estimate the survival probability of each group along  
491 time.

## 492 tRNA methylation and copy number

493 For consistency with the current version of publicly available and pre-processed 450k DNA  
494 methylation and SNP6 segmented copy number alteration (CNA) data from firebrowse, we  
495 used the human reference genome GRCh37/hg19 (Genome Reference Consortium Human  
496 Reference 37, GCA\_000001405.1) in this analysis. The coordinates of all nuclear tRNA  
497 genes were obtained using tRNAscan-SE [v2.0] (47).

498 Regarding DNA methylation, we computed the average beta value of each tRNA gene from  
499 1.5kb upstream of the transcription start site (1500TSS) until the end of the gene. For CNA,  
500 we retrieved the segmented data of precomputed  $\log_2(CN) - 1$  from firebrowse and  
501 extracted the corresponding value for the genomic coordinates containing the tRNA genes.  
502 Whenever the tRNA genes was located between two segments, the weighted average in  
503 function of the gene overlap with each segment was computed.

## 504 Bisulfite sequencing methylation

505 As 1500TSS methylation of tRNA genes lead to an average coverage of only 37% genes,  
506 we also analyzed the recently published bisulfite sequencing data of 47 samples across nine  
507 cancer types (Table S3) (39). After retrieving the datasets from the GDC legacy archive,  
508 given the higher resolution of bisulfite sequencing data, we restricted the computation of the  
509 average promoter methylation of tRNA genes to the GRCh37/hg19 genomic coordinates  
510 containing the tRNA genes, since the promoter region of Pol-III-genes is intragenic.

## 511 Multiple Linear Regression (MLR)

512 We fitted a Multiple Linear Regression (MLR) between the square-root-normalized tRNA  
513 expression (dependent variable) and the promoter methylation and gene copy number  
514 (independent variables). To make all three layers of information comparable, we considered  
515 only samples for which all data was available and performed the regression at the  
516 isoacceptor level, thus averaging the methylation and CNA data over all tRNA genes that  
517 shared the same anticodon.

$$EXP = \beta_0 + \beta_{Me}Me + \beta_{CNA}CNA$$

518 We fitted the model parameters for all 64 isoacceptors and 22 cancer types, leading to  
519 22x64=1408 MLRs, among which only significant coefficients (FDR-corrected t-statistic p-  
520 value < 0.05) were considered in downstream analyses.

## 521 **Statistical Analysis**

522 For hypothesis testing, an unpaired two-tailed Wilcoxon rank-sum test was performed,  
523 unless stated otherwise. All details of the statistical analyses can be found in the Results  
524 section. We used a significance value of 0.05. In differential expression analyses, a False  
525 Discovery Rate correction was used to account for multiple testing.

## 526 **ABBREVIATIONS**

527 TCGA: The Cancer Genome Atlas

528 PCA: Principal Component Analysis

529 GSEA: Gene Set Enrichment Analysis

530 RAA: Relative Anticodon Abundance

531 RTE: Relative Translation Efficiency

532 RTEw: RTE weights

533 tAI: tRNA Adaptation Index

534 RtAI: Relative tAI

- 535 CNA: Copy Number Alteration
- 536 BLCA: Bladder Urothelial Carcinoma
- 537 BRCA: Breast invasive carcinoma
- 538 CESC: Cervical squamous cell carcinoma and endocervical adenocarcinoma
- 539 CHOL: Cholangiocarcinoma
- 540 COAD: Colon adenocarcinoma
- 541 ESCA: Esophageal carcinoma
- 542 GBM: Glioblastoma multiforme
- 543 HNSC: Head and Neck squamous cell carcinoma
- 544 KICH: Kidney Chromophobe
- 545 KIRC: Kidney renal clear cell carcinoma
- 546 KIRP: Kidney renal papillary cell carcinoma
- 547 LIHC: Liver hepatocellular carcinoma
- 548 LUAD: Lung adenocarcinoma
- 549 LUSC: Lung squamous cell carcinoma
- 550 PAAD: Pancreatic adenocarcinoma
- 551 PCPG: Pheochromocytoma and Paraganglioma
- 552 PRAD: Prostate adenocarcinoma
- 553 READ: Rectum adenocarcinoma
- 554 SKCM: Skin Cutaneous Melanoma
- 555 STAD: Stomach adenocarcinoma
- 556 THCA: Thyroid carcinoma
- 557 THYM: Thymoma
- 558 UCEC: Uterine Corpus Endometrial Carcinoma

559 **DECLARATIONS**

560 **ETHICS APPROVAL AND CONSENT TO PARTICIPATE**

561 Not applicable.

562 **CONSENT FOR PUBLICATION**

563 Not applicable.

564 **AVAILABILITY OF DATA AND MATERIALS**

565 HEK293 Small RNA-seq datasets

566 The four HEK293 datasets were downloaded from the NCBI Sequence Read Archive (SRA):  
567 SRR1304304, ERR705692, ERR705691, SRR2060090.

568 The Cancer Genome Atlas

569 Raw small RNA-sequencing data in BAM format were retrieved from the GDC legacy archive  
570 after obtaining the necessary permissions from dbGaP, comprising all healthy samples (NT,  
571 solid tissue normal) and their primary tumor (PT) counterparts, which consists of 23 cancer  
572 types (BRCA, PRAD, KICH, KIRP, KIRC, LUAD, LUSC, HNSC, UCEC, CESC, LIHC, CHOL,  
573 THCA, COAD, READ, ESCA, STAD, BLCA, PAAD, THYM, SKCM, PCPG, GBM). For  
574 samples for which more than one BAM was available, all files were downloaded. BAM files  
575 were converted to FASTQ using SAMtools [v1.3.1] (51). We retrieved publicly available and  
576 pre-processed mRNA-seq gene expression, 450k DNA methylation, and SNP6 segmented  
577 copy number alteration (CNA) from firebrowse. As for proteomics, preprocessed protein  
578 assembly data and protein relative abundance were obtained from CPTAC for TCGA  
579 samples including BRCA, COAD and READ.



## 580 Coding sequences

581 The coding sequences of *Homo sapiens* from RefSeq were downloaded from the  
582 Codon/Codon Pair Usage Tables (CoCoPUTs) project release as of February 6, 2019  
583 (52,53).

## 584 GO gene sets

585 Gene sets derived from the GO Biological Process Ontology were downloaded from the  
586 Molecular Signatures Database [v6.2] (MSigDB) as a GMT file (50,54).

## 587 Generated data and code

588 The code used in this study is available at GitHub [[https://github.com/hexavier/tRNA\\_TCGA](https://github.com/hexavier/tRNA_TCGA);  
589 [https://github.com/hexavier/tRNA\\_mapping](https://github.com/hexavier/tRNA_mapping)], and the generated datasets are publicly  
590 accessible at Synapse ([www.synapse.org/tRNA\\_TCGA](http://www.synapse.org/tRNA_TCGA), syn20640275). Hydro-tRNA and  
591 small RNA sequencing data of all five cell lines has been made available at the Gene  
592 Expression Omnibus (GEO): GSE137834. Hydro-tRNAseq data from HEK293 and HeLa has  
593 been previously published (36) and deposited at ArrayExpress under accession number E-  
594 MTAB-8144.

## 595 **COMPETING INTERESTS**

596 The authors declare that they have no competing interests.

## 597 **FUNDING**

598 We acknowledge the support of the Spanish Ministry of Economy and Competitiveness,  
599 'Centro de Excelencia Severo Ochoa', the CERCA Programme / Generalitat de Catalunya,  
600 and the Spanish Ministry of Economy, Industry and Competitiveness (MEIC) to the EMBL  
601 partnership. The work of X.H. has been supported by a PhD fellowship from the Fundación  
602 Ramón Areces.

## 603 **AUTHORS' CONTRIBUTIONS**

604 Conceptualization, X.H., M.H.S. and L.S.; Methodology, X.H., H.B., M.H.S., L.S.; Software,  
605 X.H.; Investigation, H.B., X.H.; Validation, X.H., M.H.S.; Formal analysis, X.H., M.H.S.;  
606 Writing-Original Draft, X.H.; Writing-Review & Editing, X.H., H.B., M.H.S., L.S.; Visualisation:  
607 X.H., M.H.S.; Funding Acquisition, L.S.; Supervision, M.H.S. and L.S.

## 608 **ACKNOWLEDGEMENTS**

609 We thank Eva Maria Novoa Pardo, Samuel Miravet-Verde, and Marc Weber for stimulating  
610 and critical discussions. We thank the CRG Genomics Unit for assistance with RNA  
611 sequencing services. The results published here are in part based upon data generated by  
612 the TCGA Research Network: <https://www.cancer.gov/tcga>.

## 613 **REFERENCES**

- 614 1. Hanson G, Collier J. Codon optimality, bias and usage in translation and mRNA decay.  
615 *Nat Rev Mol Cell Biol.* 2017 Oct 11;19(1):20–30.
- 616 2. Supek F. The Code of Silence: Widespread Associations Between Synonymous Codon  
617 Biases and Gene Function. *J Mol Evol.* 2016 Jan;82(1):65–73.
- 618 3. Najafabadi HS, Goodarzi H, Salavati R. Universal function-specificity of codon usage.  
619 *Nucleic Acids Res.* 2009 Nov;37(21):7014–23.
- 620 4. Gingold H, Tehler D, Christoffersen NR, Nielsen MM, Asmar F, Kooistra SM, et al. A  
621 Dual Program for Translation Regulation in Cellular Proliferation and Differentiation.  
622 *Cell.* 2014 Sep;158(6):1281–92.
- 623 5. Pouyet F, Mouchiroud D, Duret L, Sémon M. Recombination, meiotic expression and  
624 human codon usage. *eLife* [Internet]. 2017 Aug 15 [cited 2018 Nov 7];6. Available from:  
625 <https://elifesciences.org/articles/27344>
- 626 6. Chan PP, Lowe TM. GtRNADB 2.0: an expanded database of transfer RNA genes  
627 identified in complete and draft genomes. *Nucleic Acids Res.* 2016 Jan 4;44(D1):D184-  
628 189.
- 629 7. Schimmel P. The emerging complexity of the tRNA world: mammalian tRNAs beyond  
630 protein synthesis. *Nat Rev Mol Cell Biol.* 2018 Jan;19(1):45–58.
- 631 8. Pan T. Modifications and functional genomics of human transfer RNA. *Cell Res.* 2018  
632 Apr;28(4):395.
- 633 9. Rak R, Dahan O, Pilpel Y. Repertoires of tRNAs: The Couplers of Genomics and  
634 Proteomics. *Annu Rev Cell Dev Biol.* 2018 Oct 6;34(1):239–64.
- 635 10. Dittmar KA, Goodenbour JM, Pan T. Tissue-Specific Differences in Human Transfer  
636 RNA Expression. *PLOS Genet.* 2006 Dec 22;2(12):e221.
- 637 11. Waldman YY, Tuller T, Shlomi T, Sharan R, Ruppin E. Translation efficiency in  
638 humans: tissue specificity, global optimization and differences between developmental  
639 stages. *Nucleic Acids Res.* 2010 May 1;38(9):2964–74.
- 640 12. Gogakos T, Brown M, Garzia A, Meyer C, Hafner M, Tuschl T. Characterizing  
641 Expression and Processing of Precursor and Mature Human tRNAs by Hydro-tRNAseq  
642 and PAR-CLIP. *Cell Rep.* 2017 Aug;20(6):1463–75.

- 643 13. Zheng G, Qin Y, Clark WC, Dai Q, Yi C, He C, et al. Efficient and quantitative high-  
644 throughput tRNA sequencing. *Nat Methods*. 2015 Sep;12(9):835–7.
- 645 14. Guo Y, Bosompem A, Mohan S, Erdogan B, Ye F, Vickers KC, et al. Transfer RNA  
646 detection by small RNA deep sequencing and disease association with myelodysplastic  
647 syndromes. *BMC Genomics*. 2015 Sep 24;16(1):727.
- 648 15. Guo Y, Xiong Y, Sheng Q, Zhao S, Wattacheril J, Flynn CR. A micro-RNA expression-  
649 signature for human NAFLD progression. *J Gastroenterol*. 2016 Oct;51(10):1022–30.
- 650 16. Hoffmann A, Fallmann J, Vilardo E, Mörl M, Stadler PF, Amman F. Accurate mapping  
651 of tRNA reads. *Bioinformatics*. 2018 Apr 1;34(7):1116–24.
- 652 17. Pundhir S, Gorodkin J. Differential and coherent processing patterns from small RNAs.  
653 *Sci Rep [Internet]*. 2015 Jul 13 [cited 2019 Jun 21];5. Available from:  
654 <https://www.ncbi.nlm.nih.gov/pmc/articles/PMC4499813/>
- 655 18. Torres AG, Piñeyro D, Rodríguez-Escribà M, Camacho N, Reina O, Saint-Léger A, et  
656 al. Inosine modifications in human tRNAs are incorporated at the precursor tRNA level.  
657 *Nucleic Acids Res*. 2015 May 26;43(10):5145–57.
- 658 19. Zhang Z, Ye Y, Gong J, Ruan H, Liu C-J, Xiang Y, et al. Global analysis of tRNA and  
659 translation factor expression reveals a dynamic landscape of translational regulation in  
660 human cancers. *Commun Biol*. 2018 Dec 21;1(1):234.
- 661 20. Zhang Z, Ruan H, Liu C-J, Ye Y, Gong J, Diao L, et al. tRiC: a user-friendly data portal  
662 to explore the expression landscape of tRNAs in human cancers. *RNA Biol*. 2019 Aug  
663 25;
- 664 21. Mattijssen S, Arimbasseri AG, Iben JR, Gaidamakov S, Lee J, Hafner M, et al. LARP4  
665 mRNA codon-tRNA match contributes to LARP4 activity for ribosomal protein mRNA  
666 poly(A) tail length protection. *eLife [Internet]*. 2017 Sep 12 [cited 2019 Feb 27];6.  
667 Available from: <https://www.ncbi.nlm.nih.gov/pmc/articles/PMC5626478/>
- 668 22. Chu A, Robertson G, Brooks D, Mungall AJ, Birol I, Coope R, et al. Large-scale  
669 profiling of microRNAs for The Cancer Genome Atlas. *Nucleic Acids Res*. 2016 Jan  
670 8;44(1):e3.
- 671 23. Flores O, Kennedy EM, Skalsky RL, Cullen BR. Differential RISC association of  
672 endogenous human microRNAs predicts their inhibitory potential. *Nucleic Acids Res*.  
673 2014 Apr;42(7):4629–39.
- 674 24. Mefferd AL, Kornepati AVR, Bogerd HP, Kennedy EM, Cullen BR. Expression of  
675 CRISPR/Cas single guide RNAs using small tRNA promoters. *RNA N Y N*. 2015  
676 Sep;21(9):1683–9.
- 677 25. Scholzen T, Gerdes J. The Ki-67 protein: From the known and the unknown. *J Cell*  
678 *Physiol*. 2000;182(3):311–22.
- 679 26. Gingold H, Dahan O, Pilpel Y. Dynamic changes in translational efficiency are deduced  
680 from codon usage of the transcriptome. *Nucleic Acids Res*. 2012 Nov 1;40(20):10053–  
681 63.
- 682 27. Pechmann S, Frydman J. Evolutionary conservation of codon optimality reveals hidden  
683 signatures of cotranslational folding. *Nat Struct Mol Biol*. 2013 Feb;20(2):237–43.
- 684 28. Frumkin I, Lajoie MJ, Gregg CJ, Hornung G, Church GM, Pilpel Y. Codon usage of  
685 highly expressed genes affects proteome-wide translation efficiency. *Proc Natl Acad*  
686 *Sci U S A*. 2018 22;115(21):E4940–9.
- 687 29. Eraslan B, Wang D, Gusic M, Prokisch H, Hallström BM, Uhlén M, et al. Quantification  
688 and discovery of sequence determinants of protein per mRNA amount in 29 human  
689 tissues. *Mol Syst Biol*. 2019 Feb 1;15(2):e8513.
- 690 30. Mertins P, Mani DR, Ruggles KV, Gillette MA, Clauser KR, Wang P, et al.  
691 Proteogenomics connects somatic mutations to signalling in breast cancer. *Nature*.  
692 2016 Jun;534(7605):55–62.
- 693 31. Slebos RJC, Wang X, Wang X, Zhang B, Tabb DL, Liebler DC. Proteomic analysis of  
694 colon and rectal carcinoma using standard and customized databases. *Sci Data*. 2015  
695 Jun 23;2:150022.
- 696 32. dos Reis M, Wernisch L, Savva R. Unexpected correlations between gene expression  
697 and codon usage bias from microarray data for the whole *Escherichia coli* K-12

- 698 genome. *Nucleic Acids Res.* 2003 Dec 1;31(23):6976–85.
- 699 33. dos Reis M, Savva R, Wernisch L. Solving the riddle of codon usage preferences: a  
700 test for translational selection. *Nucleic Acids Res.* 2004 Jan 1;32(17):5036–44.
- 701 34. Bornelöv S, Selmi T, Flad S, Dietmann S, Frye M. Codon usage optimization in  
702 pluripotent embryonic stem cells. *Genome Biol.* 2019 Jun 7;20(1):119.
- 703 35. Fornasiero EF, Rizzoli SO. Pathological changes are associated with shifts in the  
704 employment of synonymous codons at the transcriptome level. *BMC Genomics.* 2019  
705 Jul 9;20(1):566.
- 706 36. Benisty H, Weber M, Hernandez-Alias X, Schaefer MH, Serrano L. Proliferation specific  
707 codon usage facilitates oncogene translation. *Manuscr Submitt Publ [Internet].* 2019 Jul  
708 11 [cited 2019 Jul 24]; Available from:  
709 <https://www.biorxiv.org/content/10.1101/695957v1>
- 710 37. Goodarzi H, Nguyen HCB, Zhang S, Dill BD, Molina H, Tavazoie SF. Modulated  
711 Expression of Specific tRNAs Drives Gene Expression and Cancer Progression. *Cell.*  
712 2016 Jun;165(6):1416–27.
- 713 38. Loayza-Puch F, Rooijers K, Buil LCM, Zijlstra J, F. Oude Vrielink J, Lopes R, et al.  
714 Tumour-specific proline vulnerability uncovered by differential ribosome codon reading.  
715 *Nature.* 2016 Feb;530(7591):490–4.
- 716 39. Zhou W, Dinh HQ, Ramjan Z, Weisenberger DJ, Nicolet CM, Shen H, et al. DNA  
717 methylation loss in late-replicating domains is linked to mitotic cell division. *Nat Genet.*  
718 2018 Apr;50(4):591–602.
- 719 40. Torres AG, Reina O, Attolini CS-O, Pouplana LR de. Differential expression of human  
720 tRNA genes drives the abundance of tRNA-derived fragments. *Proc Natl Acad Sci.*  
721 2019 Apr 23;116(17):8451–6.
- 722 41. Evans ME, Clark WC, Zheng G, Pan T. Determination of tRNA aminoacylation levels by  
723 high-throughput sequencing. *Nucleic Acids Res.* 2017 Aug 21;45(14):e133.
- 724 42. Ingolia NT, Ghaemmaghami S, Newman JRS, Weissman JS. Genome-Wide Analysis  
725 in Vivo of Translation with Nucleotide Resolution Using Ribosome Profiling. *Science.*  
726 2009 Apr 10;324(5924):218–23.
- 727 43. Rudolph KLM, Schmitt BM, Villar D, White RJ, Marioni JC, Kutter C, et al. Codon-  
728 Driven Translational Efficiency Is Stable across Diverse Mammalian Cell States. *Galtier*  
729 *N, editor. PLOS Genet.* 2016 May 11;12(5):e1006024.
- 730 44. Park J-L, Lee Y-S, Kunkeaw N, Kim S-Y, Kim I-H, Lee YS. Epigenetic regulation of  
731 noncoding RNA transcription by mammalian RNA polymerase III. *Epigenomics.* 2017  
732 Jan 23;9(2):171–87.
- 733 45. Lant JT, Berg MD, Heinemann IU, Brandl CJ, O'Donoghue P. Pathways to disease  
734 from natural variations in human cytoplasmic tRNAs. *J Biol Chem.* 2019 Apr  
735 5;294(14):5294–308.
- 736 46. Telonis AG, Loher P, Magee R, Pliatsika V, Londin E, Kirino Y, et al. tRNA Fragments  
737 Show Intertwining with mRNAs of Specific Repeat Content and Have Links to  
738 Disparities. *Cancer Res.* 2019 Jan 1;canres.0789.2019.
- 739 47. Chan PP, Lowe TM. tRNAscan-SE: Searching for tRNA Genes in Genomic Sequences.  
740 *Methods Mol Biol Clifton NJ.* 2019;1962:1–14.
- 741 48. Hoffmann S, Otto C, Kurtz S, Sharma CM, Khaitovich P, Vogel J, et al. Fast mapping of  
742 short sequences with mismatches, insertions and deletions using index structures.  
743 *PLoS Comput Biol.* 2009 Sep;5(9):e1000502.
- 744 49. McKenna A, Hanna M, Banks E, Sivachenko A, Cibulskis K, Kernytsky A, et al. The  
745 Genome Analysis Toolkit: a MapReduce framework for analyzing next-generation DNA  
746 sequencing data. *Genome Res.* 2010 Sep;20(9):1297–303.
- 747 50. Subramanian A, Tamayo P, Mootha VK, Mukherjee S, Ebert BL, Gillette MA, et al.  
748 Gene set enrichment analysis: A knowledge-based approach for interpreting genome-  
749 wide expression profiles. *Proc Natl Acad Sci U S A.* 2005 Oct 25;102(43):15545–50.
- 750 51. Li H, Handsaker B, Wysoker A, Fennell T, Ruan J, Homer N, et al. The Sequence  
751 Alignment/Map format and SAMtools. *Bioinforma Oxf Engl.* 2009 Aug 15;25(16):2078–  
752 9.

- 753 52. Alexaki A, Kames J, Holcomb DD, Athey J, Santana-Quintero LV, Lam PVN, et al.  
754 Codon and Codon-Pair Usage Tables (CoCoPUTs): Facilitating Genetic Variation  
755 Analyses and Recombinant Gene Design. *J Mol Biol.* 2019 Jun 14;431(13):2434–41.  
756 53. Athey J, Alexaki A, Osipova E, Rostovtsev A, Santana-Quintero LV, Katneni U, et al. A  
757 new and updated resource for codon usage tables. *BMC Bioinformatics.* 2017 Sep  
758 2;18(1):391.  
759 54. Liberzon A, Birger C, Thorvaldsdóttir H, Ghandi M, Mesirov JP, Tamayo P. The  
760 Molecular Signatures Database Hallmark Gene Set Collection. *Cell Syst.* 2015 Dec  
761 23;1(6):417–25.  
762 55. Quinlan AR, Hall IM. BEDTools: a flexible suite of utilities for comparing genomic  
763 features. *Bioinforma Oxf Engl.* 2010 Mar 15;26(6):841–2.  
764

765 **ADDITIONAL FILES**

766 **Additional file 1 - Supplemental Methods**

767 Format: PDF (.pdf)

768 List of reagents and detailed description the computational software used.

769 **Additional file 2 - Supplemental Figures**

770 Format: PDF (.pdf)

771 **Figure S1.** Medians of Relative Translation Efficiencies weights (RTEw) across all TCGA  
772 tissues, related to Figure 3. **Figure S2.** Differential expression of tRNAs between healthy  
773 and tumor samples across 22 cancer types, related to Figure 4. **Figure S3.** Differential  
774 methylation and copy number between healthy and tumor samples of tRNA genes, related to  
775 Figure 5.

776 **Additional file 3 - Table S1. Correlation Matrix**

777 Format: Comma Separated Values (.csv)

778 Correlations of tRNA expression of HEK293 from four small RNA-seq datasets against three  
779 conventional tRNA-seq quantifications.

780 **Additional file 4 - Table S2. Sequencing Quality**

781 Format: XLSX (.xlsx)

782 Comparison of tRNA reads coverage between small RNA-seq and hydro-tRNAseq datasets,  
783 as well as the coefficient of variance and the standard deviation between replicates.

784 **Additional file 5 - Table S3. TCGA samples**

785 Format: Tab Separated Values (.tsv)

786 Number and abbreviations of TCGA samples covering 23 cancer types.

787 **Additional file 6 - Table S4. GSEA RAA**

788 Format: XLSX (.xlsx)

789 Component features of the Principal Component Analysis of the Relative Anticodon  
790 Abundances (RAA, see Figure 2B). GSEA of the correlations of the first PCA component  
791 against all genes.

792 **Additional file 7 - Table S5. GSEA RTE**

793 Format: XLSX (.xlsx)

794 Component features of the Principal Component Analysis of the Relative Translational  
795 Efficiency weights (RTEw, see Figure 3B). GSEA of the correlations of the first two PCA  
796 components against all genes.

797 **Additional file 8 - Table S6. GSEA deltaRTE**

798 Format: XLSX (.xlsx)

799 GSEA of the differential RTE between extreme tissues ( $\Delta RTE = RTE_{\text{Colorectal}} - RTE_{\text{Brain}}$ ).

800 **Additional file 9 - Table S7. RTE survival analysis**

801 Format: Comma Separated Values (.csv)

802 Association of RTEw with cancer prognosis across 22 cancer types. The survival analysis  
803 was performed for all codons whose translational efficiency was significantly different in  
804 more than 5 cancer types in the one direction with respect to the other [ $Abs(UP-DOWN) > 5$ ],  
805 and correspondingly corrected for multiple comparisons using FDR.

806 **Additional file 10 - Table S8. GSEA deltaRTE KIRC**

807 Format: XLSX (.xlsx)

808 GSEA of the differential RTE between cancer and tumor samples from KIRC ( $\Delta RTE =$   
809  $RTE_{\text{Tumor}} - RTE_{\text{Healthy}}$ ).

810 **Additional file 11 - Table S9. GSEA RCU ProCCA**

811 Format: XLSX (.xlsx)

812 GSEA of the Relative Codon Usage (RCU) of the codon ProCCA among the whole genome.

813 **Additional file 12 - Table S10. MLR coefficients**

814 Format: XLSX (.xlsx)

815 Multiple Linear Regression (MLR) between the square-root-normalized tRNA expression and  
816 the promoter methylation and gene copy number.

817





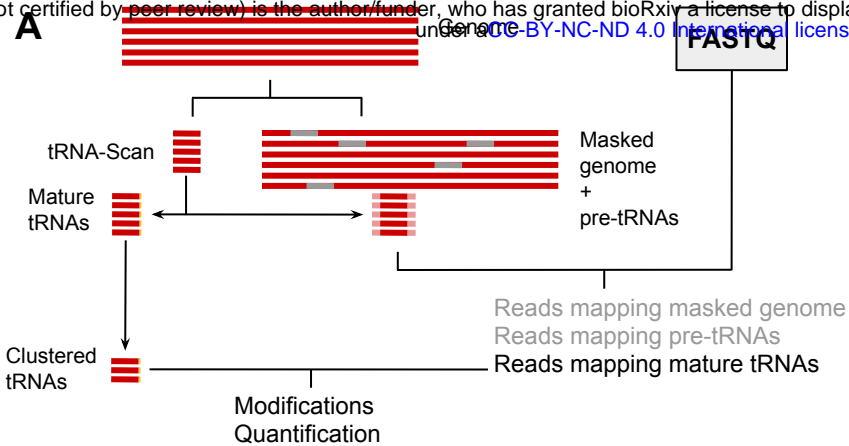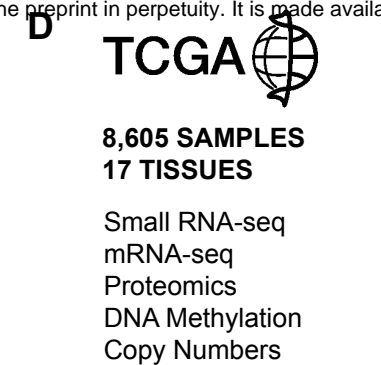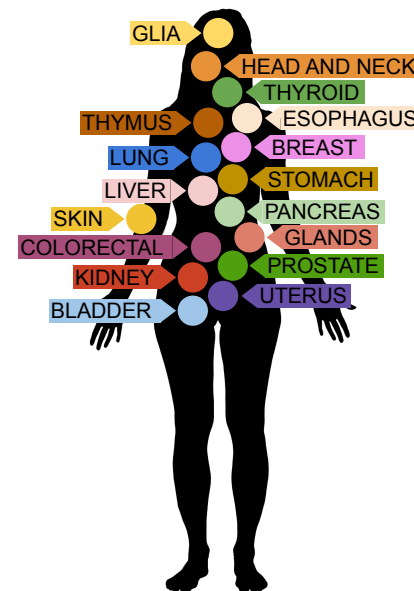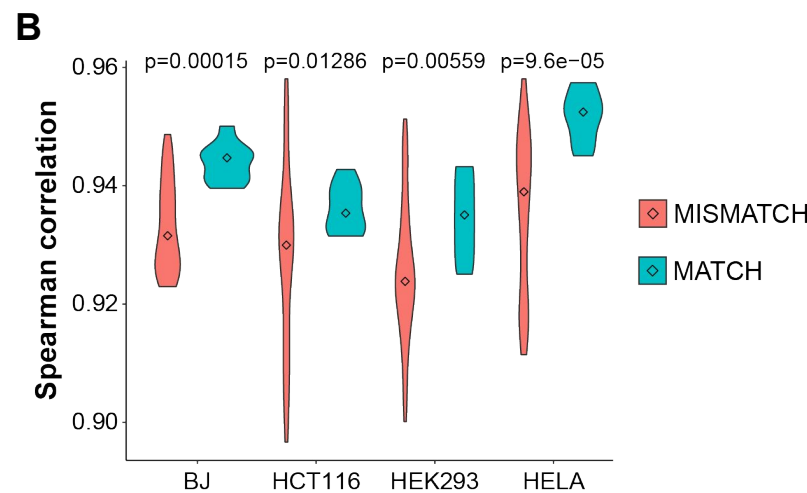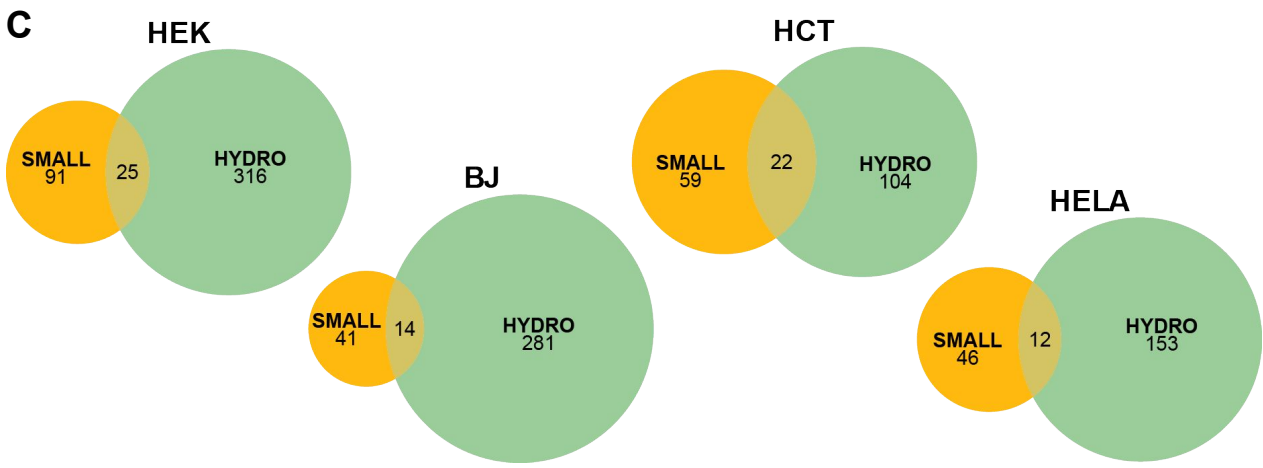



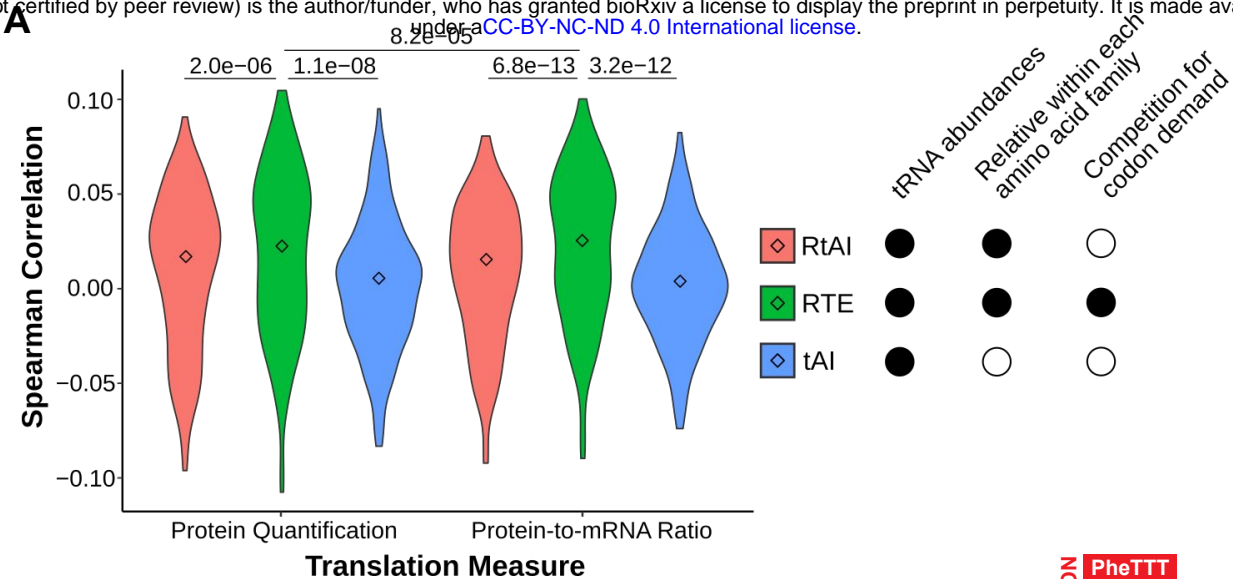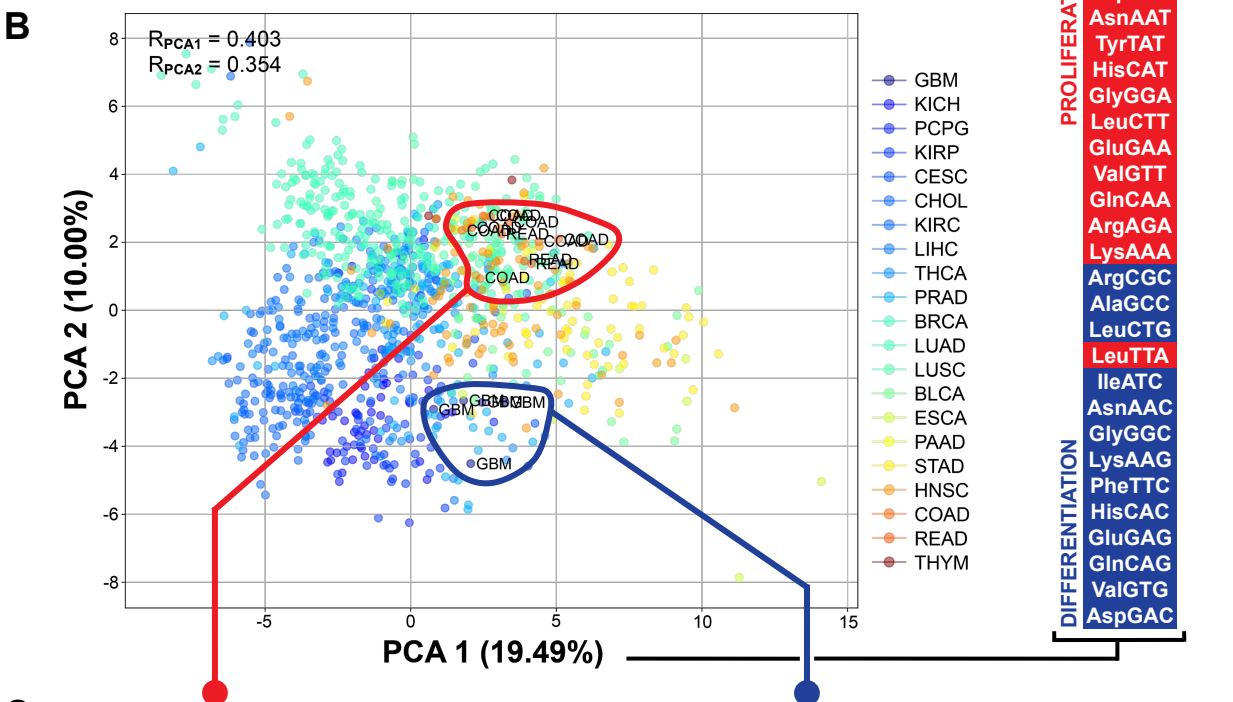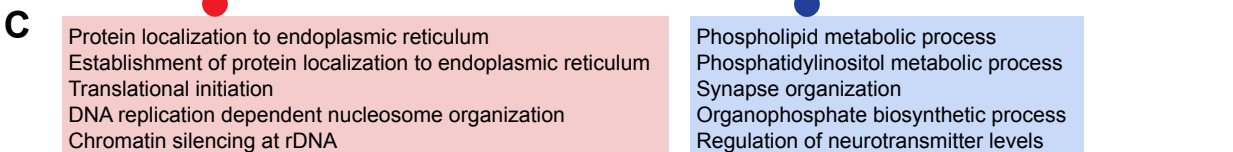



A

certified by peer review) is the author/funder, who has granted bioRxiv a license to display the preprint in perpetuity. It is made available under aCC-BY-NC-ND 4.0 International license.

B

$$\text{EXPRESSION} = \beta_0 + \beta_{\text{Me}} \text{Me} + \beta_{\text{CNA}} \text{CNA}$$

$$\beta_{\text{Me}} < 0 \quad (p = 4.67e-05)$$

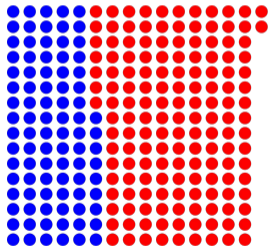

$$\beta_{\text{CNA}} > 0 \quad (p = 1.80e-15)$$

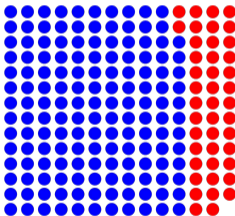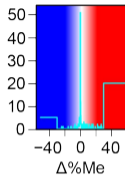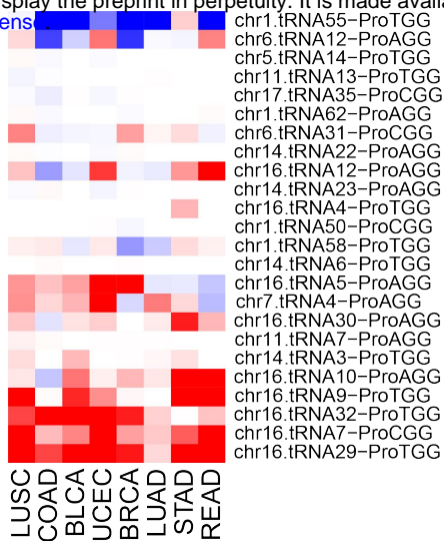

Source: https://www.biorxiv.org/content/10.1101/782227v1.full.pdf
